# Supplementary figures and images for: Modular assembly of transposon integratable multigene vectors using RecWay assembly
Source: PubMed Central journal article supplement — Nucleic Acids Res. 2013 Feb 26;41(8):e92. doi: 10.1093/nar/gkt115 (PMC3632113; doi:10.1093/nar/gkt115), 2013-02-26

(a)

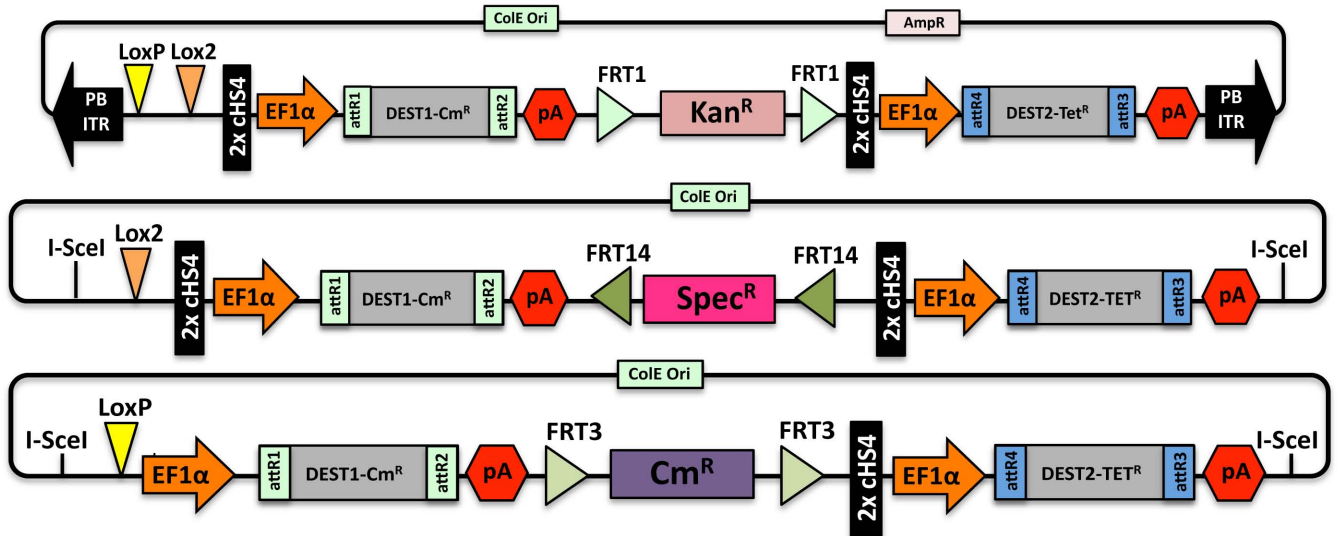

(b)

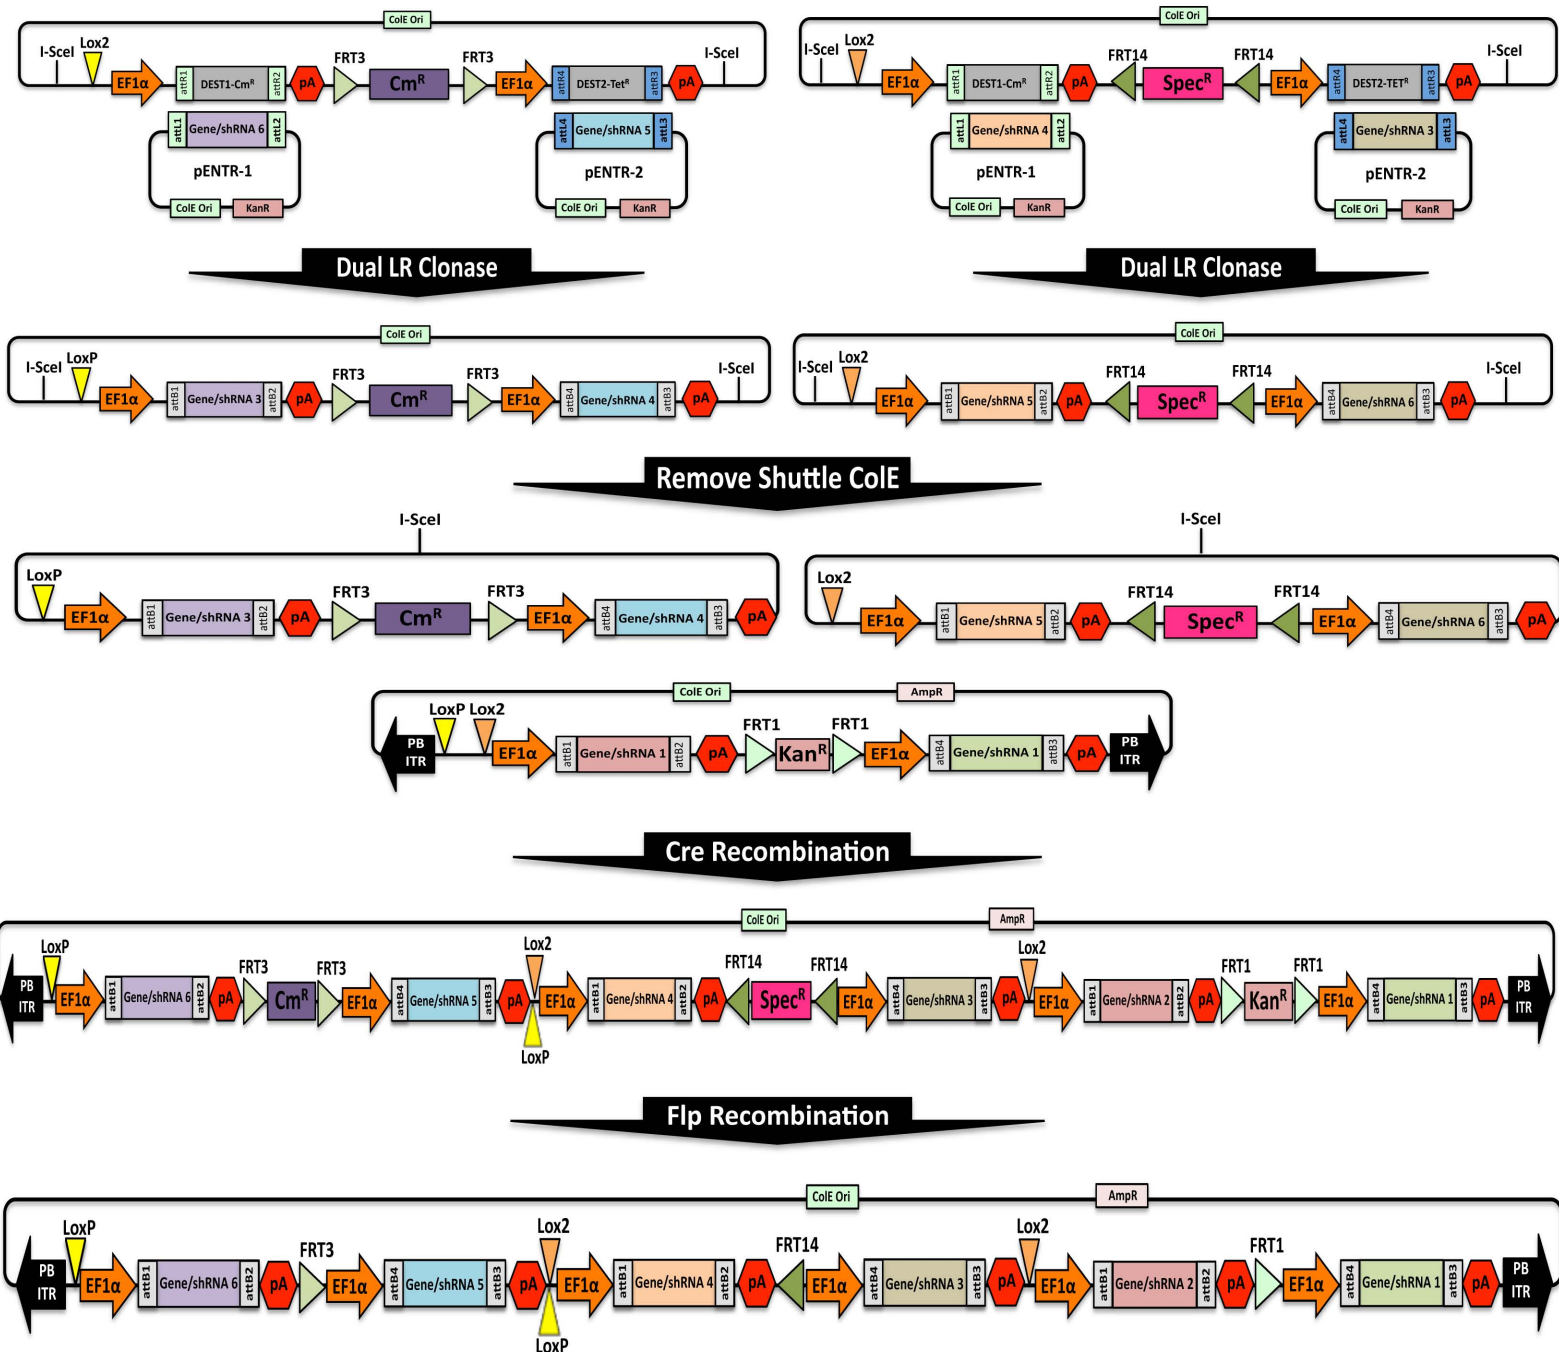

# Supplementary Figure 2

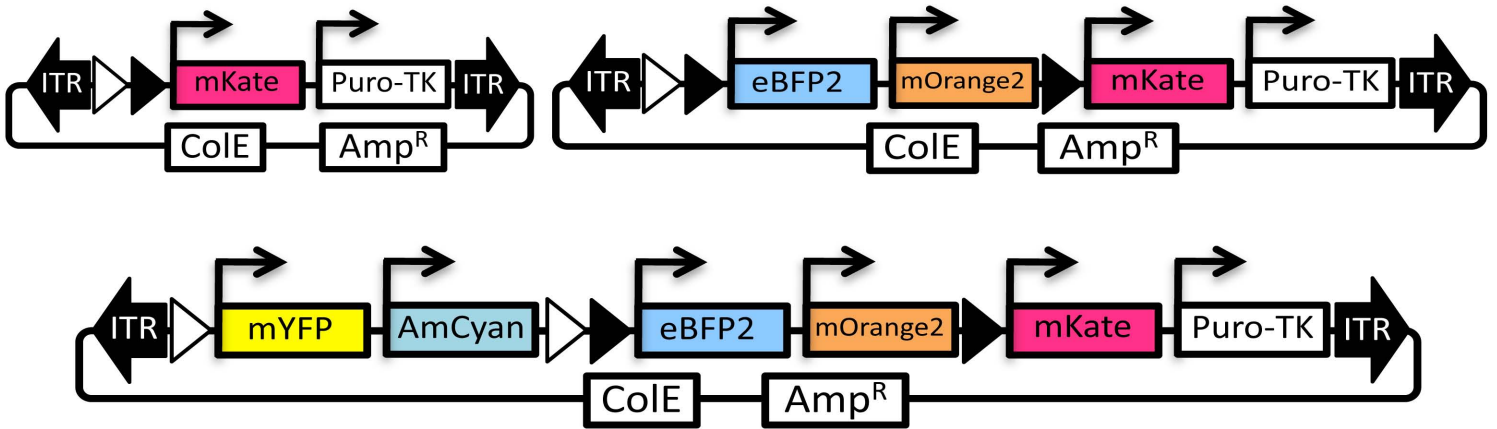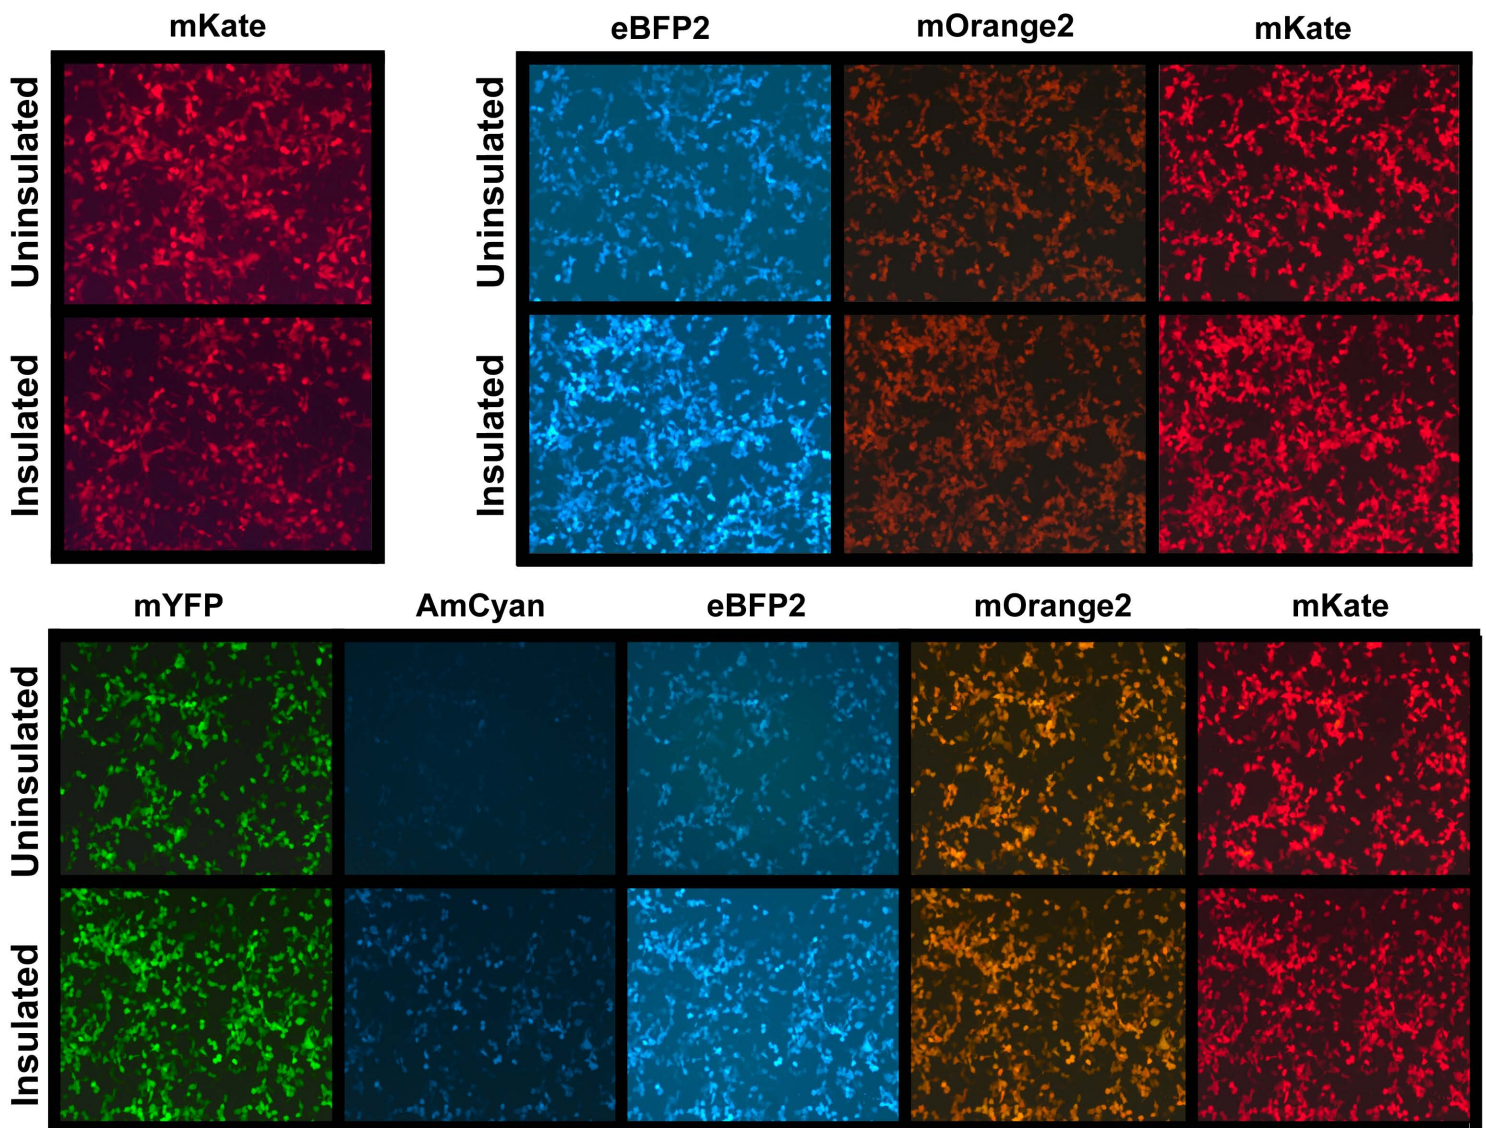



# Supplementary Figure 3

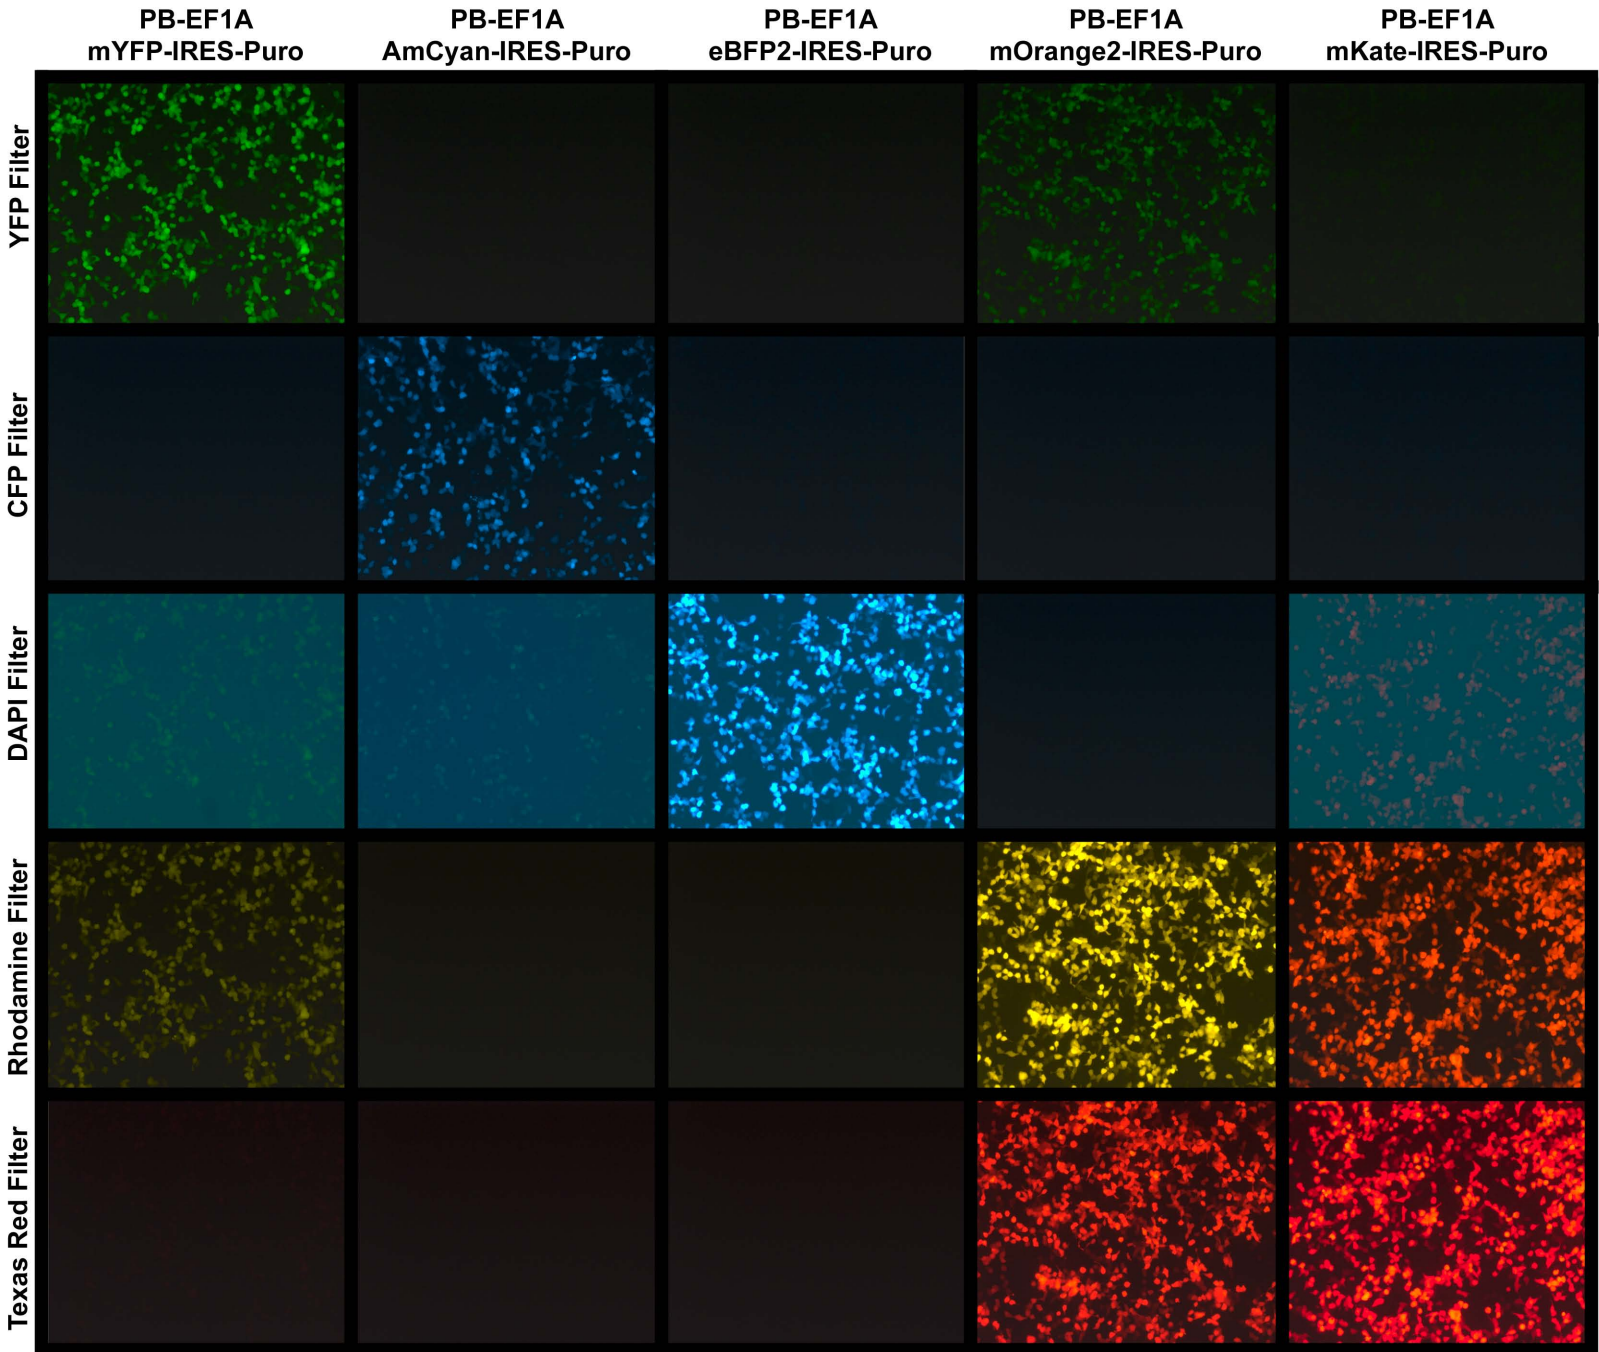

Supplement: supp_gkt115_nar-03365-h-met-2012-File003.pdf [file supp_gkt115_nar-03365-h-met-2012-File003.pdf]
